# Supplementary material for: Does Modification of Implicit Associations Regarding Contamination Affect Approach Behavior and Attentional Bias?
Source: Springer Nature journal article supplement (doi:10.1007/s10608-018-09991-6), 2019-01-02
Supplement: MOESM1 [file 16372224]

Supplementary Material

S1. Word stimuli

Table S1

Word sets that were used for different reaction time tasks.

| category | dangerous | not dangerous | cleanliness | contamination |
| --- | --- | --- | --- | --- |
| word sets | ill (krank) | gentle (sanft) | bath (Bad) | urine (Urin) |
|  | brutal (brutal) | healthy (gesund) | air (Luft) | virus (Viren) |
|  | cruel (grausam) | comfortable (bequem) | soap (Seife) | waste (Abfall) |
|  | nuclear (nuklear) | ideal (optimal) | shower (Dusche) | sperm (Sperma) |
|  | hazardous (riskant) | creative (kreativ) | water (Wasser) | dirt (Schmutz) |
|  | malicious (boshaft) | familiar (vertraut) | care (Pflege) | toilet (Toilette) |
|  | poisonous (toxisch) | sunny (sonnig) | order (Ordnung) | dustbin (Mülleimer) |
|  | dangerous (gefährlich) | safe (ungefährlich) | clarity (Reinheit) | toilet seat (Klobrille) |
| paradigm | IAT, B-IAT | IAT, B-IAT | IAT, B-IAT, spatial cueing task | IAT, B-IAT, spatial cueing task |

*Note.* German words in parentheses, IAT = Implicit Association Test, B-IAT = Brief Implicit Association Test.

S2. Manipulation Checks

S2.1 Word rating. We assessed ratings of experimental stimuli to check valid use of word sets. We therefore assessed CR-specific emotionality (anxiety, disgust, shame, arousal) as well as valence of words. We computed the mean score for each specific emotionality dimension for both word sets, respectively. Correlational analyses showed high correlations for emotionality ratings for the CR word set (all *r*s > .64, all *p*s < .001) as well as for the cleanliness word set (all *r*s > .61, all *p*s < .001). We thus collapsed ratings, computing an overall mean score for CR-specific emotionality per word set. We additionally computed the mean valence score for both word sets. A 3 x 2 mixed ANOVA on CR emotion ratings with group (NT vs. CC vs. PT) as the between-subjects factor and word-type (contamination vs. clean) as the within-subjects factor showed only a significant main effect of word-type, *F*(1,118) = 89.51, *p* < .001, ɳp² = .43, indicating higher ratings for CR words (*M* = 1.88, *SD* = 1.06) than for cleanliness words (*M* = 1.12, *SD* = 0.29) in both groups. Similarly, the same mixed ANOVA on word valence showed only a significant main effect of word-type, *F*(1,118) = 407.73, *p* < .001, ɳp² = .78, indicating lower ratings for CR words (*M* = 4.56, *SD* = 1.57) than for clean words (*M* = 7.77, *SD* = 1.18) in both groups. Results indicate more CR-specific adverse emotionality and more negative valence evoked by the CR words than by cleanliness words. Even though the mean difference regarding the CR emotion ratings is small, this indicates a valid use of word sets as intended.

We assessed automatic orienting of attention-presenting words for 14 ms during the spatial cueing task. To ensure that words could not be fully read and processed strategically, we conducted a categorization task, presenting the same words in the same set up, instructing participants to indicate to which category the word belonged via keypress. Analyses on readability for words presented for 14 ms showed that participants had an error rate of 28% (*SD* = 11, range: 0-63%). Mixed ANOVA did not show a significant main effect of group or word category nor an interaction effect (all *F*s < 1.73, all *p*s > .20), showing the same error rate across groups and word categories. Results indicate a moderate readability of quickly presented words. An error rate of 50% would show categorization by chance. This would indicate no readability, hence automatic processing of words. An error rate of 0% would show categorization by understanding meaning of the word. This would indicate readability, hence strategic processing of words. During the categorization task, participants had the instruction to read words and categorize them. Participants did not have an additional decision-making task for the probe as in the spatial cueing task. We therefore assume that participants had a stronger focus on presented words during the categorization task, which led to a lower error rate than by chance. We also assume that an error rate of 28% is a good enough indicator that words during the spatial cueing paradigm could not fully be read and were automatically processed.

S2.2 Additional emotionality ratings. In addition to the STAI-S ratings which we assessed at the beginning and end of the experiment, we used visual analogue scales (VAS) to assess current anxiety, disgust, shame and arousal, to (1) map the time-course of adverse emotionality during the experiment and ensure valid results of the STAI-S and (2) control for further contamination-related emotionality ratings. Participants gave ratings by marking a scale corresponding to their current emotional state (e.g., “I feel disgusted”). Scales had anchors from left-end “not at all” to the right end “very much”. Corresponding scores for analyses ranged from 0-100, with higher scores indicating stronger feelings. We assessed VAS at six time points during the experiment: (1) at the beginning of computer tasks (i.e. right before the STAI-S1 and other questionnaires), (2) before the IAT-training task, (3) after the IAT-training task, (4) after the B-IAT assessment task, (5) before the BATs and (6) after the BATs (i.e. right before the STAI-S2).

We conducted a 3 (group: NT vs. CC vs. PT) x 6 (time: pre questionnaires vs. pre IAT vs. post IAT vs. post BIAT vs. pre BAT vs. post BAT) mixed ANOVA with repeated measures on the second factor, which showed a significant main effect of Time *F*(1.8,213) = 64.03, *p* < .001, ɳp² = .35. The main effect of group, *F*(2,118) = 0.29, *p* = .75, ɳp² < .01, and the interaction effect, *F*(3.6,213) = 0.40, *p* = .79, ɳp² < .01, were non-significant. Planned contrasts revealed a significant increase in adverse emotionality from VAS1 to VAS2, *F*(1,118) = 11.03, *p* = .001, ɳp² = .09, and from VAS5 to VAS6, *F*(1,118) = 79.65, *p* < .001, ɳp² = .40. All other contrasts and interactions were non-significant (all F < 3.52, all p > .05). Time-course of VAS-ratings is depicted in Figure S1.

More detailed inspection of the increase in adverse emotionality of interest (pre to post BAT) showed that the effect was primarily driven by an increase in disgust, *F*(1,118) = 166.94, *p* < .001, ɳp² = .59, anxiety, *F*(1,118) = 20.17, *p* < .001, ɳp² = .15, and shame, *F*(1,118) = 30.33, *p* < .001, ɳp² = .20, across groups. There was no increase in arousal from pre to post BAT across groups, *F*(1,118) = 0.72, *p* < .40, ɳp² < .01.


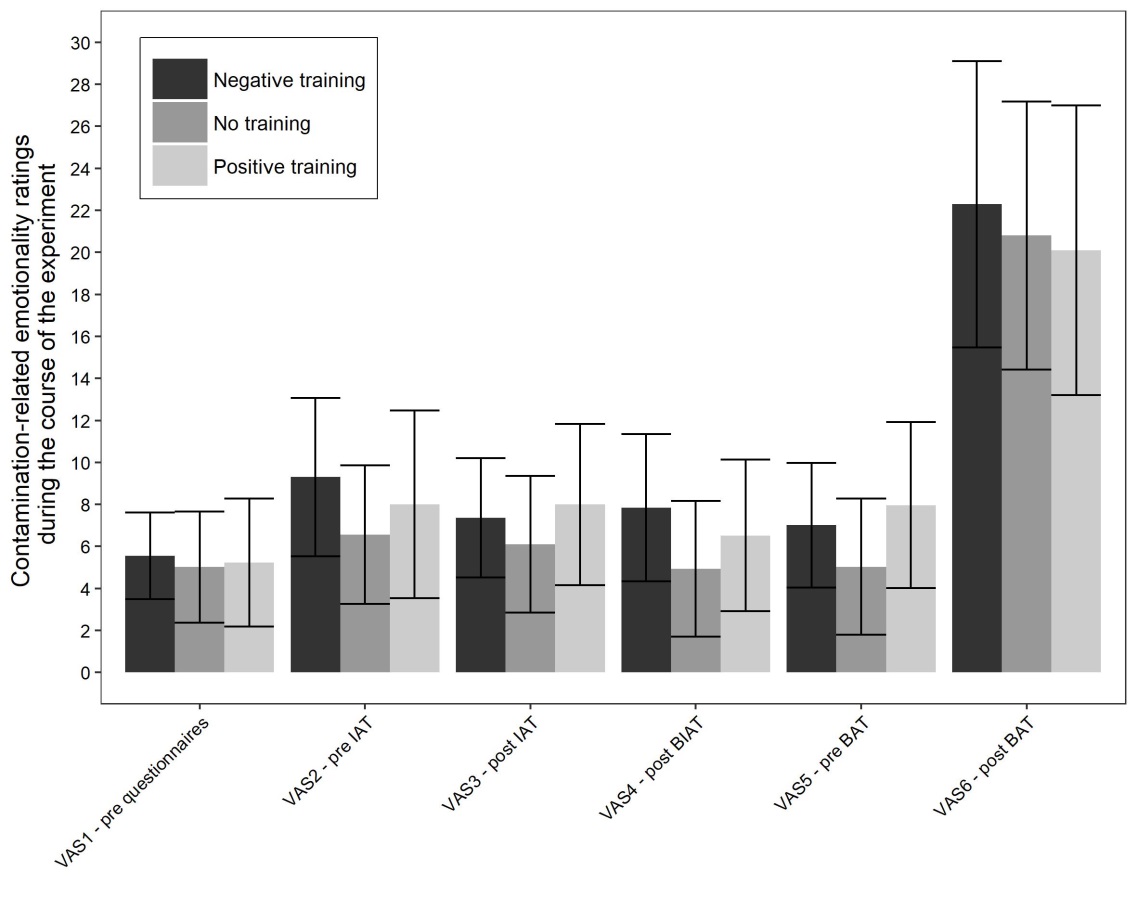


*Figure S1*. Mean adverse emotionality ratings per training group over the course of the experiment.

S3. Subsample Analyses on the BATs

In a follow-up analysis, we wanted to explore the floor effect of anxiety for a better understanding of the null results in our BATs. For that, we conducted a split-half procedure on the scores of the trait scale of the STAI (Spielberger et al., 1977). Trait anxiety has been shown to correlate with effects on behavioral approach. A split-half procedure on OC related measures was not done. Since we recruited a healthy sample, variance was too low for meaningful interpretation of split-half analyses. Figure 2 depicts ratings on BAT-emotion for each training group separately for low anxious participants (left) and for higher anxious participants (right).

We first conducted a between-group analysis on BAT emotion ratings, independent of **training** group to investigate floor effects. Results of the 2 (STAI: low vs. higher anxious) x 4 (emotion rating: anxiety vs. disgust vs. urge to wash vs. conducted steps) ANOVA showed significant differences on anxiety, *F*(1,119) = 15.51, *p* < .001, ɳp² = .12, disgust, *F*(1,119) = 25.70, *p* < .001, ɳp² = .18 and urge to wash hands, *F*(1,119) = 11.22, *p* < .01, *ɳp²* = .09. There were no significant differences in number of conducted steps between low and higher anxious participants, *F*(1,119) = 0.02, *p* = .88, ɳp² < .001. As depicted in Figure S2, this indicates that the floor effect of anxiety might be driven by low levels in the low anxiety group, pointing at their resilience for induction of emotional reactivity. Further it shows a general difference in evoked emotions during BATs of low and higher anxious participants independent of training group. We further investigated differential response patterns dependent of training group by investigating low and higher anxious participants, separately.

We thus conducted subsample analyses for specific induction effects with ANOVAs on BAT emotion ratings for each STAI-group separately. For the low anxious participants, the ANOVA revealed no significant differences between groups (all *F*s < 0.71, all *p*s > .50). For the higher anxious participants, the ANOVA revealed a significant effect for disgust, *F*(2,59) = 3.73, *p* = .03, ɳp² = .11, and urge to wash hands, *F*(2,59) = 4.22, *p* = .02, ɳp² = .13. There were no statistically significant differences for anxiety, *F*(2,59) = 2.38, *p* = .10, ɳp² = .08, or number of conducted steps, *F*(2,59) = 0.53, *p* = .59, ɳp² = .02. Bonferroni corrected comparisons showed significantly lower scores in the PT compared to the CC for disgust (*M*PT = 5.1, *M*CC = 6.9, *p* < .05) and urge to wash (*M*PT = 4.9, *M*CC = 6.8, *p* < .05) in the high anxious group. This indicates a protective effect of positive training on emotional reactivity. However, unlike hypothesized, there was no significant effect of elevated ratings in the NT compared to both other groups (all *p*s > .21).


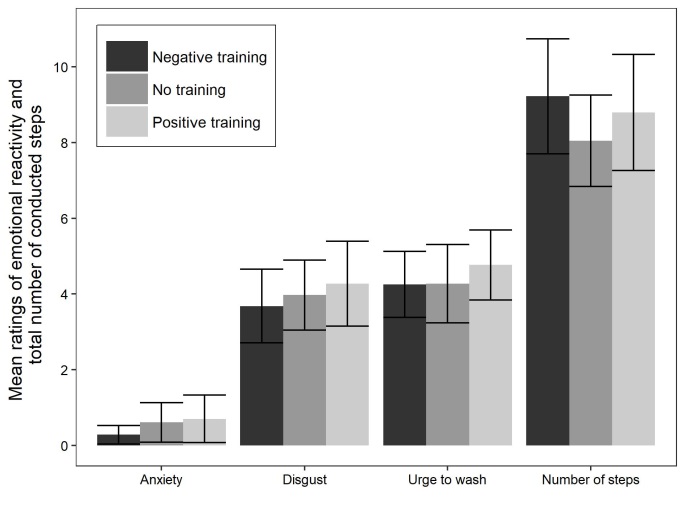

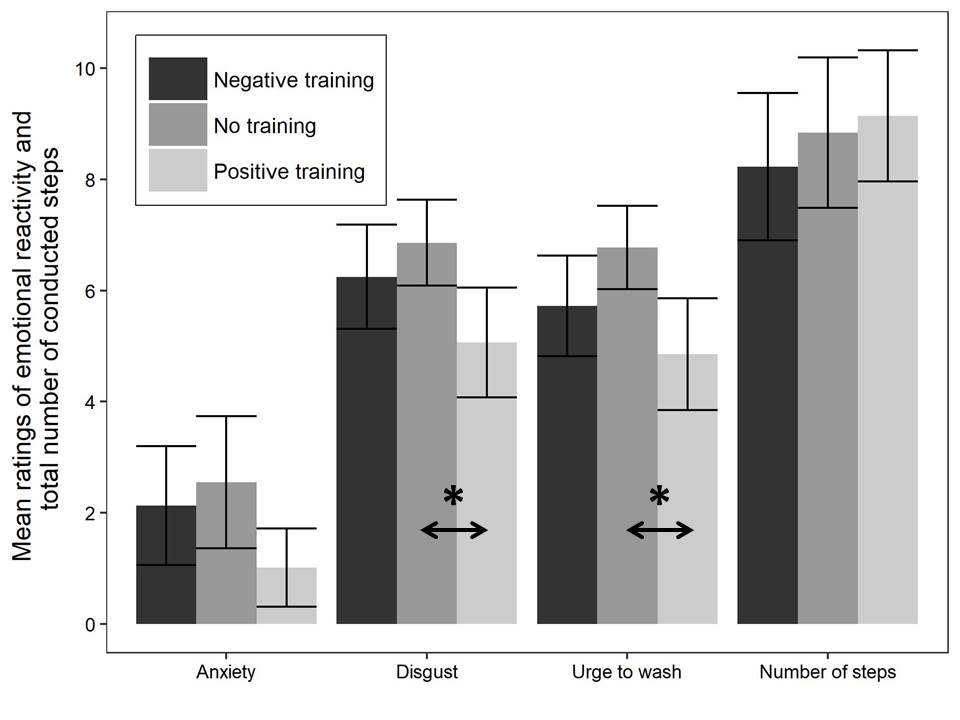


*Figure S2*. Mean performance ratings on the BATs per training group separate for low anxious (left) and higher anxious (right) subsamples.

S4. Bayesian Analyses

We additionally analyzed the reaction time data of the spatial cueing task with a Bayesian repeated measures mixed ANOVA. Bayes Factors (BFs) allow quantifying the evidence for or against the alternative hypotheses, whereas *p*-values from traditional statistical testing mainly allow an acceptance or rejection of the null hypothesis (Wagenmakers et al., 2018). BFs were interpreted as presented by Wetzels et al. (2011). They suggest classifying the values of BFs into 11 different groups, for example *decisive evidence for H1* for BF10 > 100 or *decisive evidence for H0* for BF10 < 1/100 (Wetzels et al., 2011). Analyses were conducted with JASP (2018), using the default priors. The BFs for the interaction terms were calculated as the Baws factor as described by Mathôt (2017). The Baws factor for higher-order interaction is calculated as the sum of P(M|data) of all models with this interaction divided by the sum of P(M|data) of all models without this interaction (Mathôt, 2017). We give the analysis of effects table for better interpretation of interaction effects (s. Table S2). The Baws factor is represented in the BFInclusion.

Table S2

*Analysis of effects of the Bayesian repeated measures ANOVA of the spatial cueing data.*

| Effects | | P(incl) | | P(incl|data) | | BFInclusion | |
| --- | --- | --- | --- | --- | --- | --- | --- |
| valence |  | 0.114 |  | 0.102 |  | 0.118 |  |
| validity |  | 0.114 |  | 0.782 |  | 5.467e  +7 |  |
| duration |  | 0.114 |  | 0.773 |  | 1.409e +90 |  |
| condition |  | 0.114 |  | 0.154 |  | 0.191 |  |
| valence ✻validity |  | 0.299 |  | 0.015 |  | 0.124 |  |
| valence ✻duration |  | 0.299 |  | 0.024 |  | 0.208 |  |
| valence ✻condition |  | 0.299 |  | 8.940e  -4 |  | 0.035 |  |
| validity ✻duration |  | 0.299 |  | 0.192 |  | 0.237 |  |
| validity ✻condition |  | 0.299 |  | 0.017 |  | 0.099 |  |
| duration ✻condition |  | 0.299 |  | 0.020 |  | 0.118 |  |
| valence ✻validity ✻duration |  | 0.114 |  | 7.392e  -5 |  | 0.161 |  |
| valence ✻validity ✻condition |  | 0.114 |  | 5.261e  -7 |  | 0.054 |  |
| valence ✻duration ✻condition |  | 0.114 |  | 1.133e  -6 |  | 0.093 |  |
| validity ✻duration ✻condition |  | 0.114 |  | 1.466e  -5 |  | 0.036 |  |
| valence ✻validity ✻duration ✻condition |  | 0.006 |  | 5.206e -14 |  | 0.254 |  |
|  | | | | | | | |
| *Note.* Compares models that contain the effect to equivalent models stripped of the effect. Higher-order interactions are excluded. Analysis suggested by Sebastiaan Mathôt. | | | | | | | |

The estimated BFInclusion for the overall 4-way interaction is 0.25. This means that the data have changed the odds in favor of models that include the predictor by a factor of 0.25. For better interpretation, BFExclusion = 1/0.25 = 4 (Wagenmakers, 2017). This suggests substantial evidence for a model without the overall interaction (Wetzels et al., 2011). This supports results of the conventional ANOVA, leaving effects of the overall interaction of interest for our hypothesis with high probability non-significant.

References

JASP Team. (2018). JASP (Version 0.8.6). Retrieved from https://jasp-stats.org

Mathôt, S. (2017, May 15). Bayes like a baws: interpreting bayesian repeated measures in JASP. Retrieved from https://www.cogsci.nl/blog/interpreting-bayesian-repeated-measures-in-jasp

Spielberger, C. D., Gorsuch, R. L., Lushene, R., Vagg, P. R., & Jacobs, G. A. (1977). *State-Trait Anxiety Inventory for Adults*. Redwood City: Mindgarden Inc.

Wagenmakers, E.-J. (2017, November). Inclusion bayes factor across matched models. Retrieved from http://forum.cogsci.nl/index.php?p=/discussion/3510/inclusion-bayes-factor-across-matched-models

Wagenmakers, E.-J., Marsman, M., Jamil, T., Ly, A., Verhagen, J., Love, J., … Morey, R. D. (2018). Bayesian inference for psychology. Part I: Theoretical advantages and practical ramifications. *Psychonomic Bulletin & Review*, *25*(1), 35–57. https://doi.org/10.3758/s13423-017-1343-3

Wetzels, R., Matzke, D., Lee, M. D., Rouder, J. N., Iverson, G. J., & Wagenmakers, E.-J. (2011). Statistical evidence in experimental psychology: an empirical comparison using 855 *t* tests. *Perspectives on Psychological Science*, *6*(3), 291–298. https://doi.org/10.1177/1745691611406923
